# Supplementary material for: Size effect of nickel from nanoparticles to clusters to single atoms for electrochemical CO2 reduction
Source: Royal Society of Chemistry journal article supplement (doi:10.1039/d4ta03404j), 2024-01-01
Supplement: d4ta03404j1.pdf [file d4ta03404j1.pdf]

## Supporting Information

### Size effect of nickel from nanoparticles to clusters to single atoms for electrochemical CO<sub>2</sub> reduction

Qin Pan,<sup>a</sup> Yang Chen,<sup>a,b\*</sup> Hui Li,<sup>c</sup> Guanghuan Ma,<sup>a</sup> Shuoshuo Jiang,<sup>a</sup> Xin Cui,<sup>a</sup> Lei Zhang,<sup>c</sup> Yuxin Bao,<sup>a</sup> Tianyi Ma<sup>c,\*</sup>

<sup>a</sup> Institute of Clean Energy Chemistry, Key Laboratory for Green Synthesis and Preparative Chemistry of Advanced Materials of Liaoning Province, College of Chemistry, Liaoning University, Shenyang, 110036, China

<sup>b</sup> CAS Key Laboratory of Science and Technology on Applied Catalysis, Dalian Institute of Chemical Physics, Chinese Academy of Sciences, Dalian, 116023, China

<sup>c</sup> School of Science, RMIT University, Melbourne, VIC 3000, Australia

## 1. Experimental section

### 1.1 Materials

$\text{Ni}(\text{NO}_3)_2 \cdot 6\text{H}_2\text{O}$  (98%, Tianjin beilian reagents),  $\text{Zn}(\text{NO}_3)_2 \cdot 6\text{H}_2\text{O}$  (99%, AHX), 2-methylimidazole (98%, Macklin), Nickel(II) acetate tetrahydrate (99%, Aladdin), 1,4,7,10-tetraazacyclododecane (>97%, Aladdin), methanol (99.5%, Macklin), hexane ( $\geq 99.0\%$ , Fuyu chemical reagents), carbon paper (MAYA-CR-9247), Nafion solution (5 wt.%, D520), ethanol ( $\geq 99.4\%$ , Shanghai chemical reagents) were used without purification.

### 1.2 Electrochemical measurements

Linear scanning voltammograms (LSV) tests were performed in 0.5 M  $\text{KHCO}_3$  solution with a scan rate of 10 mV/s. The electrochemical surface area (ECSA) is proportional to the value of the double-layer capacitance ( $C_{dl}$ ), which can be obtained from cyclic voltammetry (CV) curves at diverse scan rates. Electrochemical impedance spectroscopy (EIS) measurements were conducted at an open-circuit voltage (OCP) with an amplitude of 5 mV over the frequency of 0.1~100000 Hz.

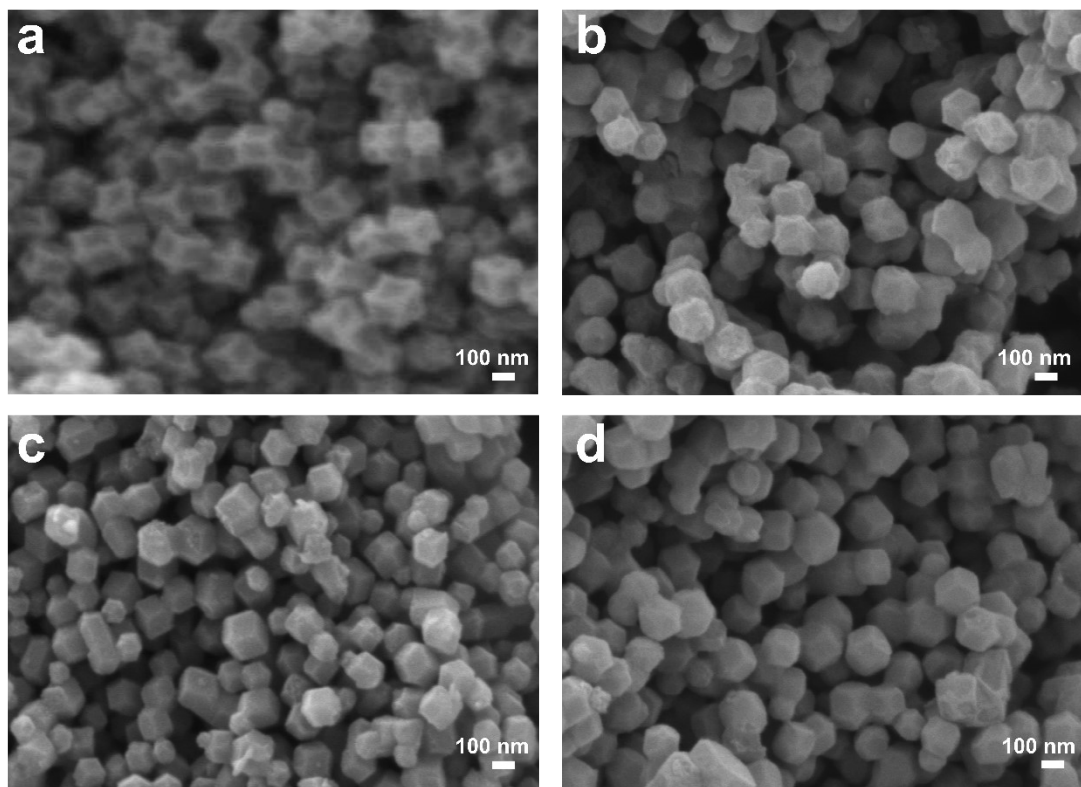

**Fig. S1.** SEM images of (a) Ni SAC, (b) Ni cluster, (c) Ni NP, and (d) N-C.

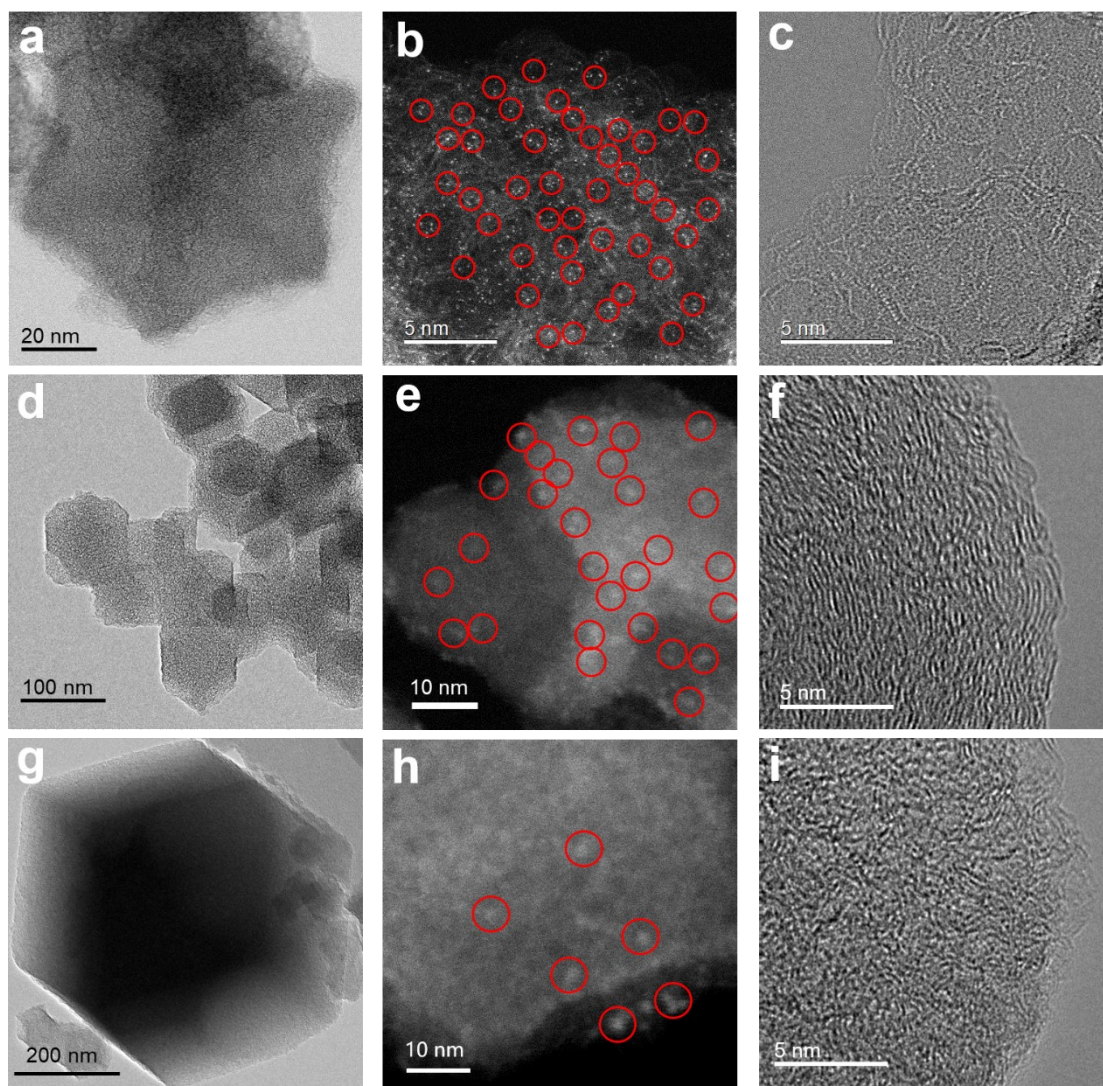

**Fig. S2.** (a-c) TEM and AC-HAADF-STEM images of Ni SAC, (d-f) TEM and HAADF-STEM images of Ni cluster, (g-i) TEM and HAADF-STEM images of Ni NP.

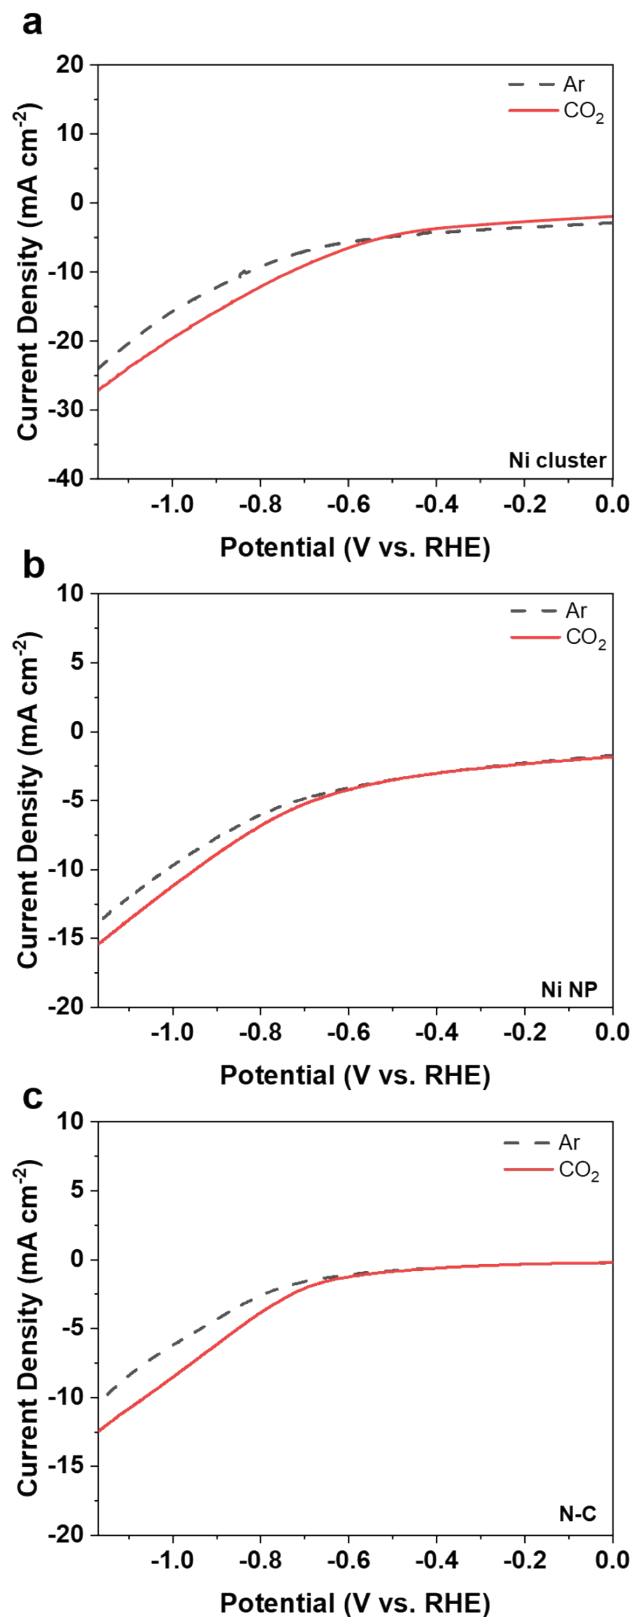

**Fig. S3.** LSV curves of different catalysts in the Ar-saturated (dotted line) and CO<sub>2</sub>-saturated (solid line) 0.5 M KHCO<sub>3</sub> electrolyte at a scan rate of 10 mV s<sup>-1</sup> of (a) Ni cluster, (b) Ni NP, and (c) N-C.

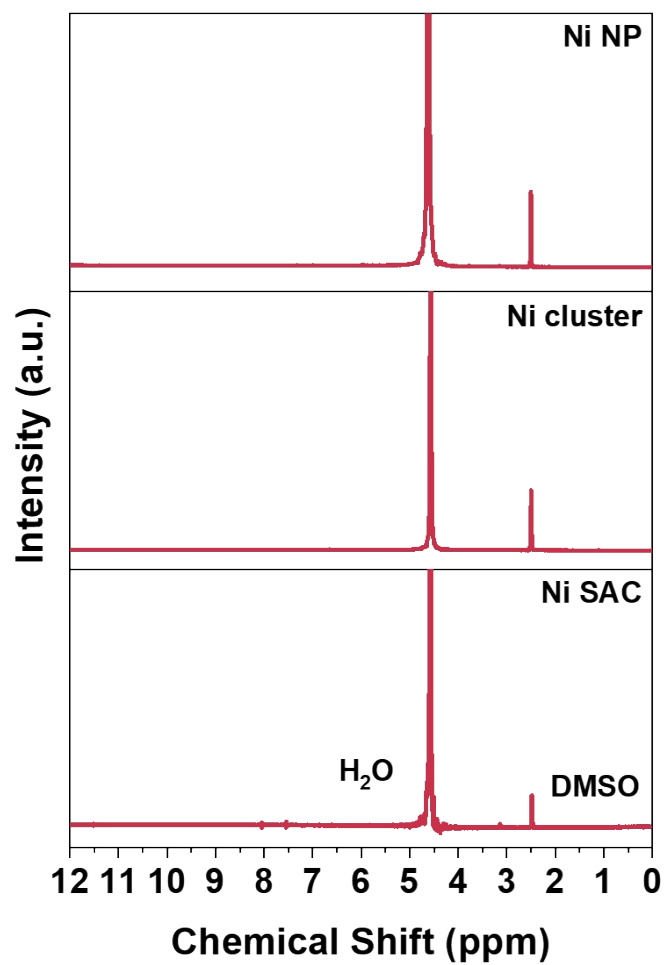

**Fig. S4.**  $^1\text{H}$  NMR spectrum of the electrolyte after  $\text{CO}_2\text{RR}$  over Ni SAC, Ni cluster, and Ni NP for 1 h at an applied potential of  $-0.8$  V vs. RHE.

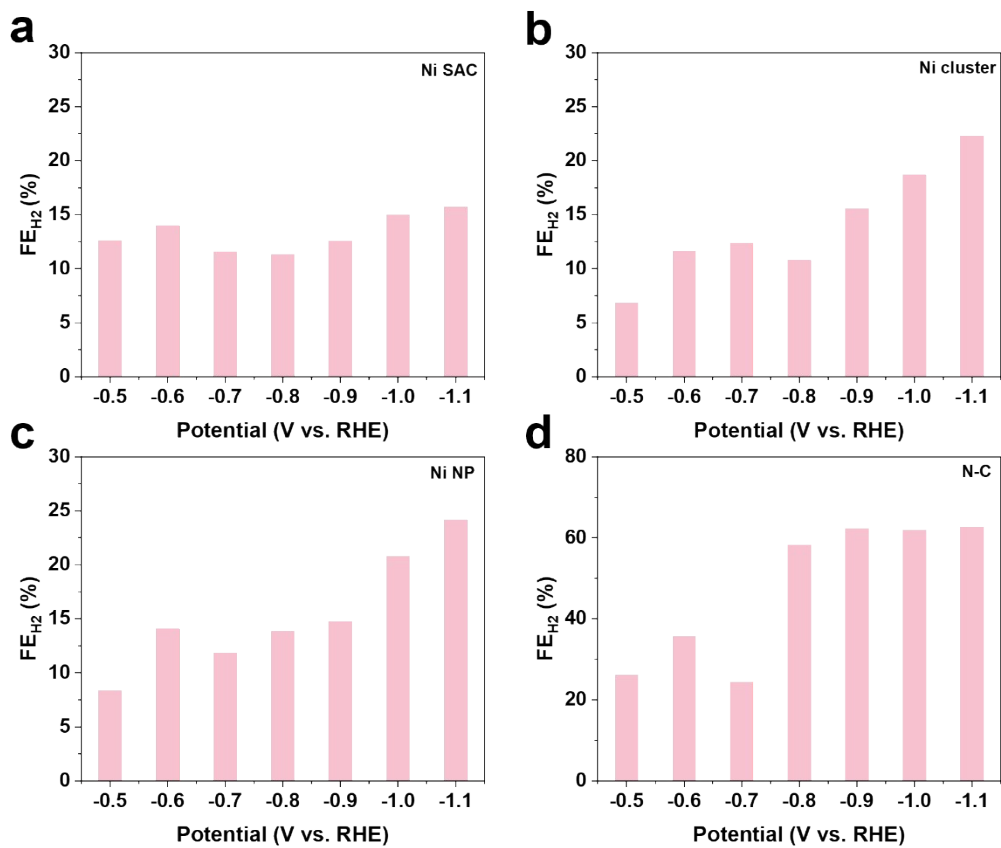

**Fig. S5.** FE<sub>H<sub>2</sub></sub> in CO<sub>2</sub>-saturated 0.5 M KHCO<sub>3</sub> at different applied potentials of (a) Ni SAC, (b) Ni cluster, (c) Ni NP, and (d) N-C, respectively.

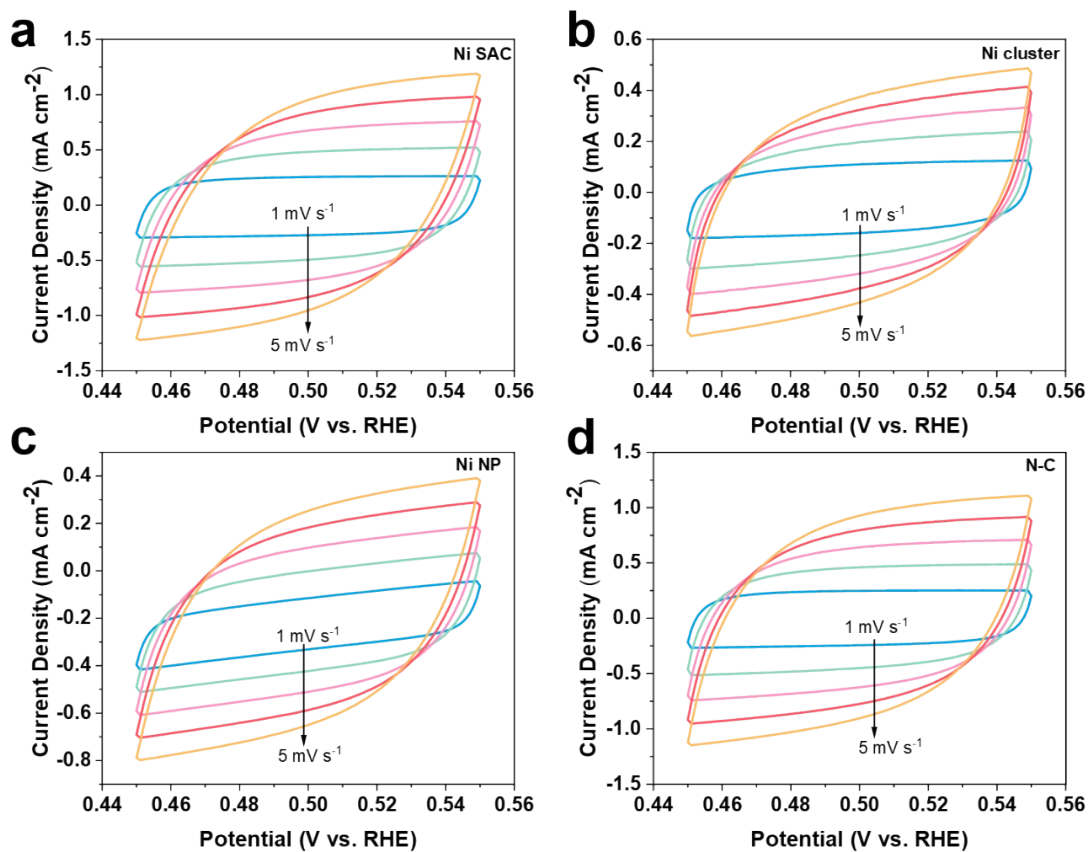

**Fig. S6.** CV measurements with scan ranging from 1 to  $5 \text{ mV s}^{-1}$  with an interval of  $1 \text{ mV s}^{-1}$  at the potential range of 0.45 V to 0.55 V vs. RHE for (a) Ni SAC, (b) Ni cluster, (c) Ni NP, and (d) N-C, respectively.



**Table S1.** Physiochemical properties of the prepared Ni SAC, Ni cluster, Ni NP, and N-C catalysts.

| Catalysts  | Ni loading (wt.%) | BET surface area ( m <sup>2</sup> /g ) | Pore volume (cm <sup>3</sup> /g) | Pore size (nm) |
|------------|-------------------|----------------------------------------|----------------------------------|----------------|
| Ni SAC     | 1.68              | 901                                    | 0.57                             | 2.53           |
| Ni cluster | 1.66              | 1406                                   | 0.94                             | 2.67           |
| Ni NP      | 1.85              | 898                                    | 0.56                             | 2.49           |
| N-C        | -                 | 841                                    | 0.49                             | 2.32           |

**Table S2.** Comparison of the electrochemical performance of metal-N-C catalysts for CO<sub>2</sub>RR.

| Catalyst             | Size (nm) | Metal loading (wt.%) | E (V vs. RHE) | FE <sub>CO</sub> (%) | J <sub>CO</sub> (mA cm <sup>-2</sup> ) | TOF (h <sup>-1</sup> ) | Ref.      |
|----------------------|-----------|----------------------|---------------|----------------------|----------------------------------------|------------------------|-----------|
| Ni SAC               | -         | 1.68                 | -0.8          | 85                   | 12                                     | 3554.5                 | This work |
| Ni cluster           | 1.1       | 1.66                 | -0.8          | 68                   | 8.2                                    | 1773.7                 | This work |
| Ni NP                | 15.3      | 1.85                 | -0.8          | 59                   | 4.0                                    | 1249.5                 | This work |
| NiPc/CNT             | -         | 0.17                 | -0.79         | 97                   | 8                                      | 4000                   | 1         |
| Ni-NC@Ni             | 0.2       | 1                    | -0.78         | 87.4                 | 24                                     | ~1752                  | 2         |
| Ni-SNC               | -         | 2.2                  | -0.8          | 95                   | 11                                     | ~109.5                 | 3         |
| Ni@N-C               | 7         | 3.9                  | -0.8          | 90                   | 17                                     | ~795.4                 | 4         |
| Fe-N-C               | -         | 1.5                  | -0.6          | 91                   | 7.5                                    | ~520.9                 | 5         |
| Fe/NG                | -         | 1.25                 | -0.6          | 80                   | 1.75                                   | ~72.9                  | 6         |
| Fe-CNPs              | 40        | 0.24                 | -0.58         | 98.8                 | 5.4                                    | ~234.4                 | 7         |
| Fe-N-G               | -         | 0.36                 | -0.58         | 94                   | 2.3                                    | 1630                   | 8         |
| FeNPs-NC             | 20        | -                    | -0.6          | 93                   | 2.5                                    | -                      | 9         |
| Fe <sub>2</sub> C-Cs | 1.07      | 1.37                 | -0.7          | 97.1                 | 8                                      | -                      | 10        |
| Co-N <sub>3</sub>    | -         | 8.01                 | -0.66         | 42                   | 7                                      | 69.4                   | 11        |
| CoPc                 | -         | 0.46                 | -0.8          | 90                   | 28                                     | ~3346                  | 12        |
| Zn NPs               | 6.8       | 0.2                  | -1.1          | 70                   | 2.8                                    | -                      | 13        |

## References

- 1 Y. J. Sa, H. Jung, D. Shin, H. Y. Jeong, S. Ringe, H. Kim, Y. J. Hwang and S. H. Joo, *ACS Catal.*, 2020, **10**, 10920-10931.
- 2 Y. He, Y. Li, J. Zhang, S. Wang, D. Huang, G. Yang, X. Yi, H. Lin, X. Han, W. Hu, Y. Deng and J. Ye, *Nano Energy*, 2020, **77**, 105010.
- 3 X. Yang, J. Cheng, H. Lv, X. Yang, L. Ding, Y. Xu, K. Zhang, W. Sun and J. Zhou, *Chem. Eng. J.*, 2022, **450**, 137950.
- 4 F. Wang, G. Wang, P. Deng, Y. Chen, J. Li, D. Wu, Z. Wang, C. Wang, Y. Hua and X. Tian, *Small*, 2023, **19**, 2301128.
- 5 T. N. Huan, N. Ranjbar, G. Rousse, M. Sougrati, A. Zitolo, V. Mougel, F. Jaouen and M. Fontecave, *ACS Catal.*, 2017, **7**, 1520-1525.
- 6 C. Zhang, S. Yang, J. Wu, M. Liu, S. Yazdi, M. Ren, J. Sha, J. Zhong, K. Nie, A. S. Jalilov, Z. Li, H. Li, B. I. Yakobson, Q. Wu, E. Ringe, H. Xu, P. M. Ajayan and J. M. Tour, *Adv. Energy Mater.*, 2018, **8**, 1703487.
- 7 C. Hu, S. Bai, L. Gao, S. Liang, J. Yang, S.-D. Cheng, S.-B. Mi and J. Qiu, *ACS Catal.*, 2019, **9**, 11579-11588.
- 8 F. Pan, B. Li, E. Sarnello, Y. Fei, X. Feng, Y. Gang, X. Xiang, L. Fang, T. Li, Y. H. Hu, G. Wang and Y. Li, *ACS Catal.*, 2020, **10**, 10803-10811.
- 9 Q. Fan, G. Bao, X. Chen, Y. Meng, S. Zhang and X. Ma, *ACS Catal.*, 2022, **12**, 7517-7523.
- 10 J. Su, D. Pan, Y. Dong, Y. Zhang, Y. Tang, J. Sun, L. Zhang, Z. Tian and L. Chen, *Adv. Energy Mater.*, 2023, **13**, 2204391.
- 11 Y. Pan, R. Lin, Y. J. Chen, S. J. Liu, W. Zhu, X. Cao, W. X. Chen, K. L. Wu, W. C. Cheong, Y. Wang, L. R. Zheng, J. Luo, Y. Lin, Y. Q. Liu, C. G. Liu, J. Li, Q. Lu, X. Chen, D. S. Wang, Q. Peng, C. Chen and Y. D. Li, *J. Am. Chem. Soc.*, 2018, **140**, 4218-4221.
- 12 M. Huang, B. Chen, H. Zhang, Y. Jin, Q. Zhi, T. Yang, K. Wang and J. Jiang, *Small Methods*, 2024, 2301652.
- 13 H. S. Jeon, I. Sinev, F. Scholten, N. J. Divins, I. Zegkinoglou, L. Pielsticker and B. R. Cuenya, *J. Am. Chem. Soc.*, 2018, **140**, 9383-9386.
